# Supplementary material
Source: PubMed Central journal article supplement (PMC2801268)
Supplement: supp_M109.041970_jbc.M109.041970-1.pdf [file supp_M109.041970_jbc.M109.041970-1.pdf]

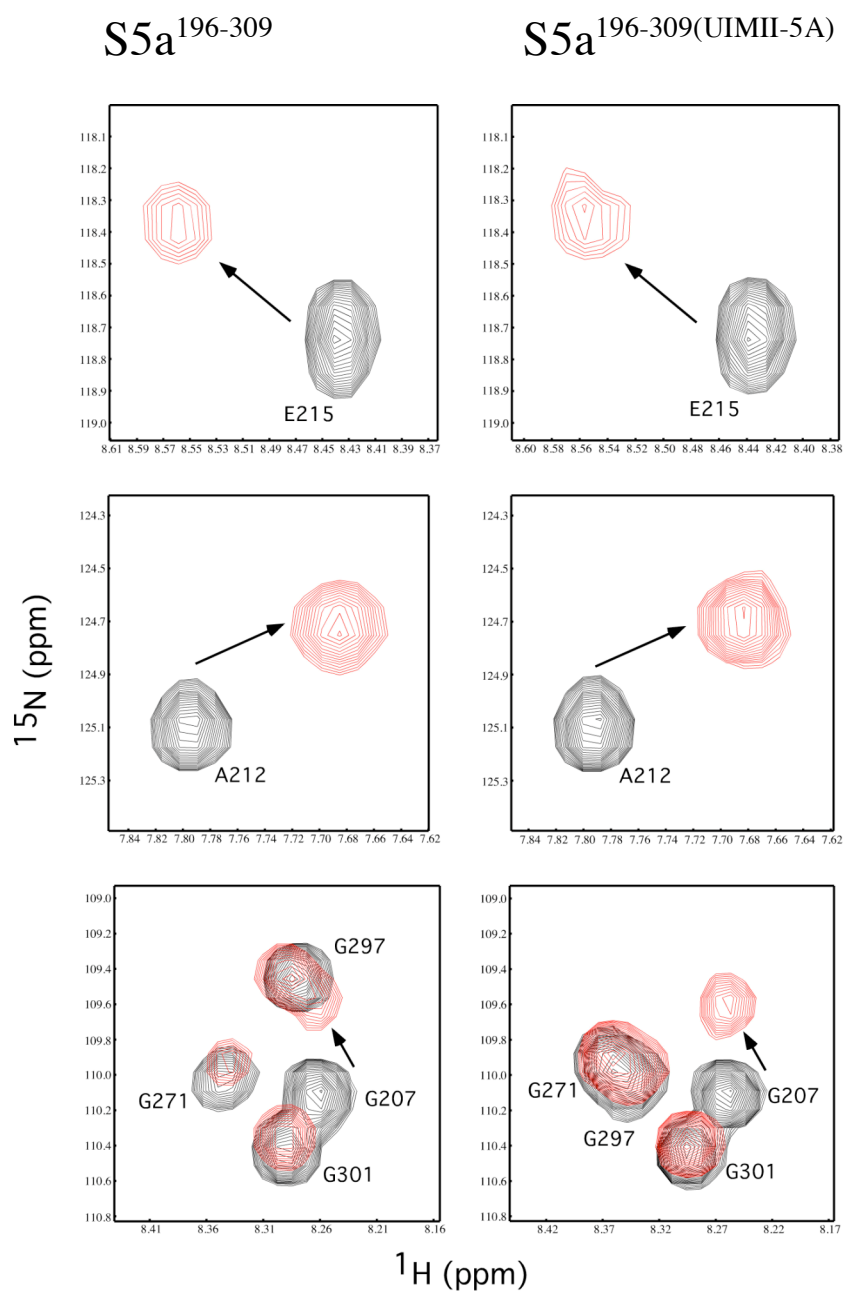

Supplementary Figure S1. Selected regions of the 600 MHz  $^1H$ - $^{15}N$  HSQC spectra showing the interaction of the parkin Ubld with  $^{15}N$ -labelled (A-C)  $S5a^{196-309}$  or (D-F)  $S5a^{196-309}(UIMII-5A)$ . In both figures the  $S5a^{196-309}$  or  $S5a^{196-309}(UIMII-5A)$  is shown in the absence of parkin Ubld (black contours) and in the presence of 2 equivalents of parkin Ubld (red contours). The spectra were collected using 500  $\mu$ M  $S5a$  protein in 10 mM  $KH_2PO_4$ , 1 mM EDTA, 1 mM DTT, 150 mM NaCl, pH 7 at 25  $^\circ$ C. The spectrum of  $S5a^{196-309}$  was assigned according to triple resonance experiments and published work (44). The spectrum of  $S5a^{196-309}(UIMII-5A)$  was assigned by triple-resonance NMR methods. Spectra are presented at different contour levels to account for line broadening in the  $S5a$  proteins upon Ubld addition.
