# Supplementary material
Source: PubMed Central journal article supplement (PMC2801268)
Supplement: supp_M109.041970_jbc.M109.041970-2.pdf [file supp_M109.041970_jbc.M109.041970-2.pdf]

Safadi and Shaw Supplementary Figure 2.

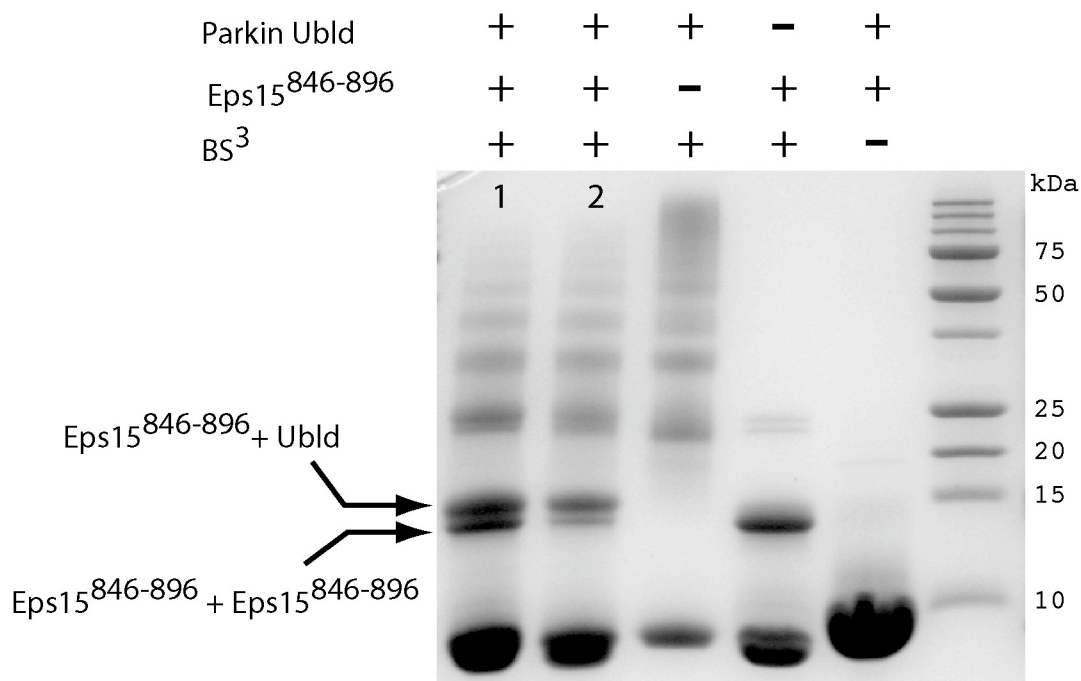

Supplementary Figure S2. The stoichiometry of the Eps15<sup>846-896</sup> binding to the parkin Ubld is 1:1. Samples of Eps15<sup>846-896</sup> and the parkin Ubld were prepared in 10 mM KH<sub>2</sub>PO<sub>4</sub>, 1 mM TCEP, 150 mM NaCl at pH 7.0. The crosslinker BS<sup>3</sup> was also prepared in the same buffer. All proteins were prepared to a final concentration of 60 μM and the crosslinker to a 10-fold excess. Following cross-linking the samples were fractionated on a tricine gel and then stained with Coomassie dye. Lane 1 has a higher concentration of Eps15<sup>846-896</sup> than lane 2. The arrows indicate the proteins that make up that molecular weight band. Some higher molecular weight bands are observed as non-specific cross-linking of the parkin Ubld, and likely contains protein aggregates.
